# Supplementary material
Source: Royal Society of Chemistry journal article supplement (doi:10.1039/d6tc01298a)
Supplement: d6tc01298a1.pdf [file d6tc01298a1.pdf]

## Supporting Information

### Kinetically Regulated Growth of CsPbBr<sub>3</sub>/CdSe Core/Shell Quantum

#### Dots for Stable Light-Emitting Diodes

Zhi-Dan Liu,<sup>†ab</sup> Long Gao,<sup>†\*c</sup> Pu Du,<sup>b</sup> Chaohui Liang,<sup>b</sup> Lin Wang,<sup>b</sup> Lei Cheng,<sup>e</sup>  
Xuyong Yang<sup>\*bd</sup> and Sheng Wang<sup>\*b</sup>

<sup>a</sup> School of Microelectronics, Shanghai University, Shanghai 201800, P. R. China

<sup>b</sup> Key Laboratory of Advanced Display and System Applications of Ministry of Education, Shanghai University, Shanghai 200072, P. R. China.

<sup>c</sup> Shanghai Frontiers Science Research Base of Intelligent Optoelectronics and Perception, Institute of Optoelectronics, Fudan University, Shanghai 200433, P. R. China

<sup>d</sup> Shanghai Engineering Research Center for Integrated Circuits and Advanced Display Materials, Shanghai 200072, P. R. China

<sup>e</sup> Shanxi Key Laboratory of Advanced Semiconductor Optoelectronic Devices and Integrated Systems Jincheng, Shanxi 048000, P. R. China

---

<sup>†</sup>These authors contributed equally to this work.

\* Corresponding author.

E-mail address: gaol\_@fudan.edu.cn (L. Gao),

yangxy@shu.edu.cn (X.Y. Yang),

nanocrystal@shu.edu.cn (S. Wang).

# 1. Experimental Section

## 1.1 Materials

1-Octadecene (ODE, 90%) and  $\text{Cs}_2\text{CO}_3$  (99.9%) were purchased from Alfa Aesar. Oleic acid (OA, 90%), oleylamine (OAm, 90%), and selenium (Se, 99.5%) were purchased from Sigma-Aldrich (Merck). Cadmium oxide ( $\text{CdO}$ , 99.99%) and lead acetate ( $\text{Pb}(\text{CH}_3\text{CO}_2)_2 \cdot 3\text{H}_2\text{O}$ , 99%) were purchased from Aladdin. Tri-n-octylphosphine (TOP,  $\text{C}_{24}\text{H}_{51}\text{P}$ , 90%), n-Hexane ( $\text{C}_6\text{H}_{14}$ , AR), and ethanol ( $\text{C}_2\text{H}_5\text{OH}$ , 99.8%) were purchased from Innochem.

## 1.2 Preparation of precursor solutions

Synthesis of the Cs-OA precursor, 0.4888 g (1.5 mmol) of  $\text{Cs}_2\text{CO}_3$ , 26 mL of ODE, and 4 mL of OA were added to a 50 mL three-neck flask. The mixture was degassed under vacuum with stirring and heated to 120 °C, maintained at this temperature for 10 minutes to remove residual water and oxygen. The temperature was then raised to 150 °C until the cesium carbonate powder was completely dissolved.

Synthesis of the Pb-OA precursor, 1.143 g (3 mmol) of lead acetate, 26 mL of ODE, and 4 mL of OA were added to a 50 mL three-neck flask. The mixture was heated to 120 °C under vacuum conditions for 30 minutes. The temperature was then raised to 150 °C until the lead acetate powder was completely dissolved.

Synthesis of the TOP-Se precursor, Selenium powder (4 mmol) was dissolved in 10 mL TOP to obtain a clear solution in a nitrogen-filled glovebox.

Synthesis of the  $\text{Cd}(\text{OA})_2$  precursor, 0.384 g cadmium oxide, 26 mL of ODE, and 4 mL OA were added to a 50 mL three-neck flask. The mixture was degassed under vacuum with stirring and heated to 120 °C, maintained at this temperature for 10 minutes to remove residual water and oxygen. Subsequently, under a nitrogen atmosphere, the temperature was raised to 240 °C and held until the cadmium oxide powder was completely dissolved.

## 1.3 Synthesis of $\text{CsPbBr}_3/\text{CdSe}$ Pe-QDs

10 mL of ODE, 0.6 mmol of OAmBr, and 1 mL of Cs-OA were added to a three-neck flask. The mixture was then vacuumed at 120 °C for 1 h. At this temperature, 0.5

mL of OAm and 0.5 mL of OA were injected. The mixture was heated while being constantly stirred until all the reactants completely dissolved, producing a clear solution. Subsequently, the reaction mixture was heated to 180 °C. Then, 1 mL of Pb-OA and 0.25 mL of CdSe precursor were rapidly injected. After 5 min of reaction, the flask was immediately immersed in an ice-water bath to quench the reaction, allowing the product to cool down to room temperature.

Purification of CsPbBr<sub>3</sub>/CdSe Pe-QDs, take 10 mL of the as-synthesized QDs solution and add 20 mL of ethyl acetate, then centrifuge at 7000 rpm for 3 min. Discard the supernatant and redisperse the precipitate in 5 mL of n-hexane. Repeat the process by adding 15 mL of ethyl acetate and centrifuging again. Finally, discard the supernatant and redisperse the final precipitate in 5 mL of n-hexane.

#### **1.4 LED fabrication**

Patterned indium tin oxide (ITO)-coated glasses were cleaned sequentially using soap, deionized water, ethanol, dichloromethane, isopropanol, and UV-ozone treatment for 15 min. PEDOT:PSS:KBr (2 mg/mL) solution was spin-coated onto the ITO-coated glass substrates at 4000 rpm for 40 s, followed by annealing in air at 150 °C for 15 min to form the hole-transporting layer. The substrates were then transferred into a N<sub>2</sub>-filled glovebox, and PTAA (8 mg mL<sup>-1</sup> chlorobenzene solution) was spin-coated on top of the PEDOT: PSS layer at 4000 rpm for 40 s and annealed at 120 °C for 20 min. Pe-QDs (8 mg/mL) were deposited by spin-coating at 2500 rpm for 30 s. An electron-transporting layer of TPBi (40 nm) and LiF/Al electrodes (1 nm/100 nm, respectively) were sequentially deposited by thermal evaporation in a vacuum deposition chamber (10<sup>-4</sup> Pa pressure).

#### **1.5 Characterization**

The X-ray diffraction (XRD) patterns were obtained by using an 18-kW diffractometer with radiation. Transmission electron microscopy (TEM) and the high-resolution TEM (HRTEM) images were obtained using a JEOL JEM-2100 microscope operated at 200 kV. UV-vis absorption spectra were recorded using a Shimadzu UV-2600 spectrophotometer. X-ray photoelectron spectroscopy (XPS) was characterized by using a Thermo Scientific Escalab 250Xi. Photoluminescence (PL) and time-

resolved PL (TRPL) spectra were collected with a Horiba spectrometer. A WITec alpha 300R confocal Raman microscopy was used to examine the Raman spectra of Pe-QDs. Electroluminescence (EL) spectroscopy was performed under forward bias conditions (0-10 V scanning, 0.5 V steps), current density-voltage (J-V), luminance-voltage (L-V), and EQE-J characteristics were conducted using a 50 mm-diameter EL-specialized integrating sphere (IS-E50) from Puyan Interconnect, coupled with a Keithley 2400 source meter. The device lifetime tests of PeLEDs were performed on a ZJZCL-1OLED aging lifespan test instrument without further packaging in a N<sub>2</sub> glovebox with O<sub>2</sub> and water below 0.1 ppm.

## 2. Supplementary Figures

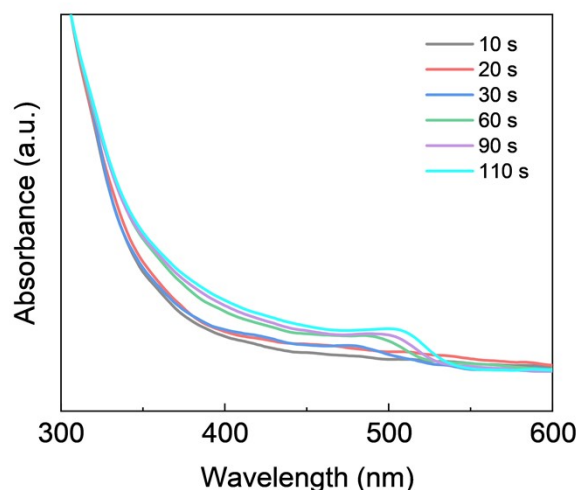

**Fig. S1.** Absorption of CdSe precursor at different stirring times at 180 °C.

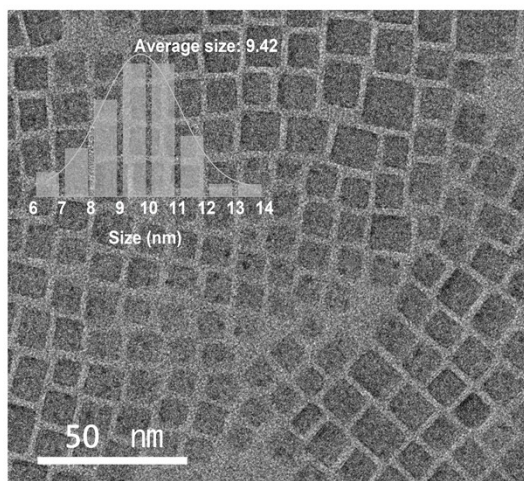

**Fig. S2.** TEM images of CsPbBr<sub>3</sub> Pe-QDs.

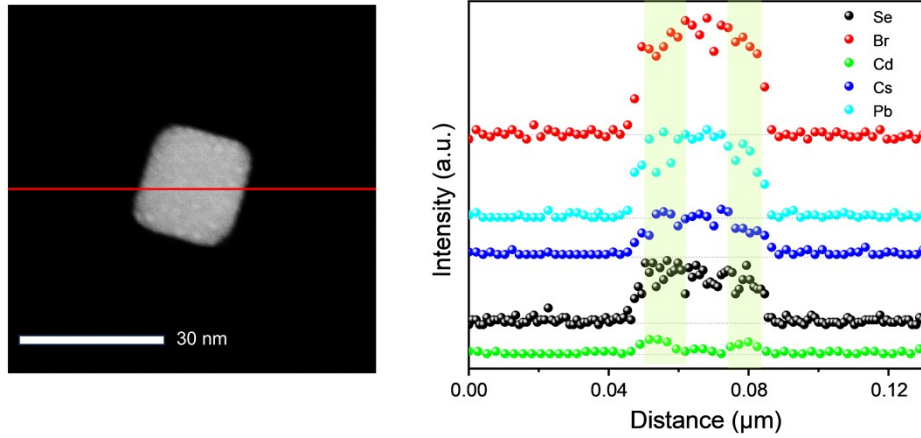

**Fig. S3.** EDS line scan of CsPbBr<sub>3</sub>/CdSe Pe-QDs.

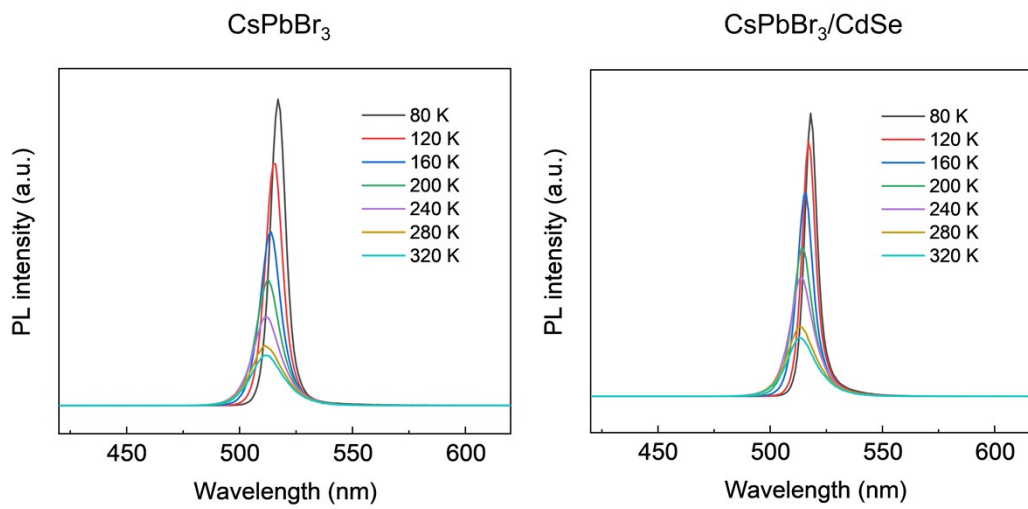

**Fig. S4.** Temperature-dependent fluorescence PL spectra of CsPbBr<sub>3</sub> Pe-QDs and CsPbBr<sub>3</sub>/CdSe C/S Pe-QDs.

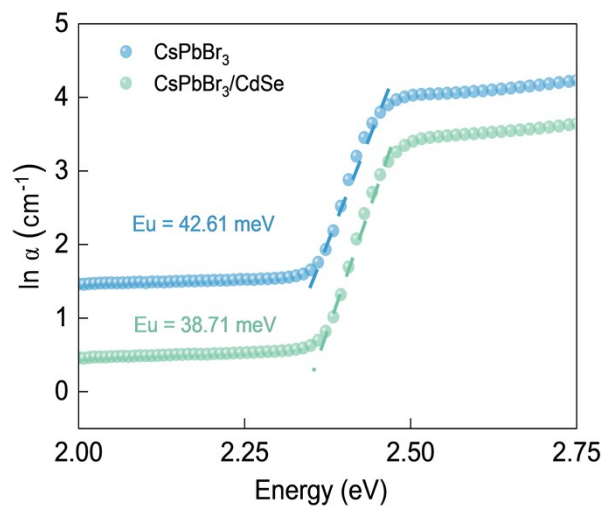

**Fig. S5.** Urbach energies.

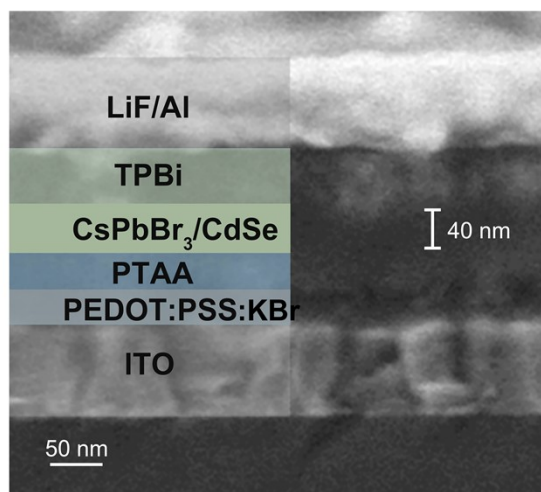

**Fig. S6.** SEM image of the cross-section of a CsPbBr<sub>3</sub>/CdSe PeLED.

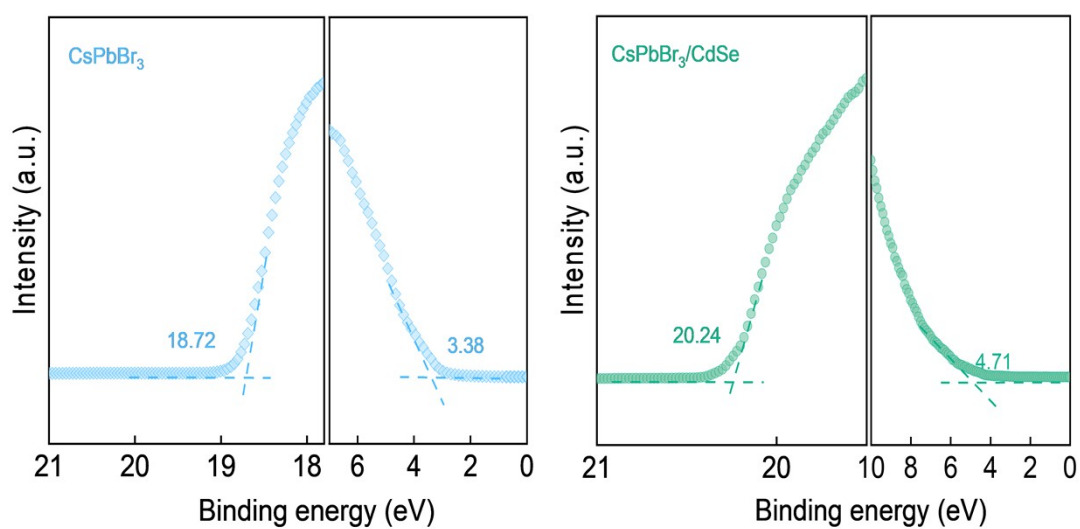

**Fig. S7.** UPS data of pristine and CsPbBr<sub>3</sub>/CdSe Pe-QDs.

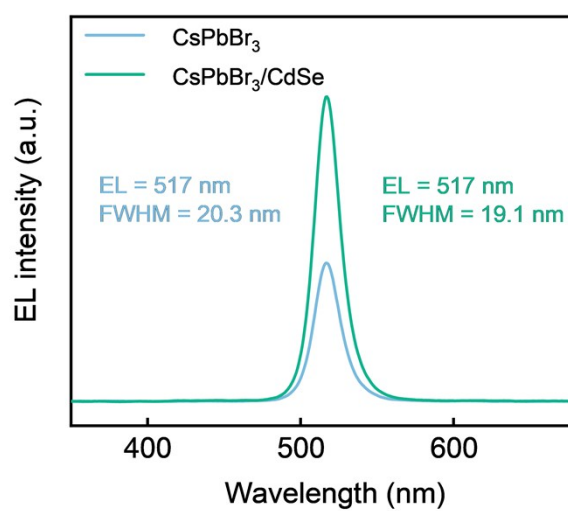

**Fig. S8.** EL spectra of CsPbBr<sub>3</sub> and CsPbBr<sub>3</sub>/CdSe PeLEDs.

**Table S1.** PL lifetimes of the CsPbBr<sub>3</sub> and CsPbBr<sub>3</sub>/CdSe, according to tri-exponential fits.

|                                | <b>A<sub>1</sub></b> | <b>τ<sub>1</sub></b> | <b>A<sub>2</sub></b> | <b>τ<sub>2</sub></b> | <b>A<sub>3</sub></b> | <b>τ<sub>3</sub></b> | <b>τ<sub>avg</sub> (ns)</b> |
|--------------------------------|----------------------|----------------------|----------------------|----------------------|----------------------|----------------------|-----------------------------|
| <b>CsPbBr<sub>3</sub></b>      | 0.26                 | 10.87                | 0.5                  | 3.7                  | 0.02                 | 58.4                 | 18.1                        |
| <b>CsPbBr<sub>3</sub>/CdSe</b> | 0.3                  | 15.7                 | 0.5                  | 4.6                  | 0.04                 | 88.5                 | 37.7                        |
